# Supplementary material for: Identification of a Novel Signature and Construction of a Nomogram Predicting Overall Survival in Clear Cell Renal Cell Carcinoma
Source: Front Genet. 2020 Sep 4;11:1017. doi: 10.3389/fgene.2020.01017 (PMC7500318; doi:10.3389/fgene.2020.01017)
Supplement: Supplementary file 11 [file Table_4.XLSX]

## Sheet: Sheet1
Table S4. Clinical characteristics of 36 ccRCC patients.
Sample Nummber	Age	Gender	Clinicopathologic diagnosis	Fuhrman nuclear grade	AJCC Stage	pT stage	pN stage	pM stage	NCF4	TCIRG1	CEP55	IFI44
1	41	Male	ccRCC	2	III	T3a	N0	M0	5.48947	22.213	4.78991	14.4534
2	68	Female	ccRCC	2	I	T1a	N0	M0	4.94739	27.1585	3.03143	11.7398
3	42	Female	ccRCC	2	I	T1a	N0	M0	5.26585	19.7439	4.37718	10.5805
4	54	Male	ccRCC	2	III	T3a	N0	M0	7.38706	9.38268	5.80247	39.6707
5	71	Male	ccRCC	2	I	T1b	N0	M0	6.94031	10.3388	6.52812	46.8507
6	45	Male	ccRCC	2	I	T1b	N0	M0	6.34227	8.51496	9.10505	47.5048
7	46	Male	ccRCC	4	III	T3a	N0	M0	11.2615	15.3837	9.08404	3.23403
8	55	Male	ccRCC	2	III	T2b	N0	M0	11.7398	15.5985	8.6538	5.59188
9	60	Male	ccRCC	2	I	T1b	N0	M0	11.2615	17.6713	8.53466	2.81539
10	49	Female	ccRCC	2	II	T1a	N0	M0	12.0003	0.672062	5.84283	1.14076
11	67	Male	ccRCC	1	I	T1b	N0	M0	10.9663	0.833161	5.22948	1.27456
12	53	Male	ccRCC	4	IV	T4	N0	M1	14.1723	0.589134	6.30574	1.07923
13	55	Male	ccRCC	1	I	T1b	N0	M0	3.24526	11.3137	3.40267	67.9625
14	55	Female	ccRCC	2	IV	T4	N1	M0	2.98625	11.3924	2.84153	68.4352
15	74	Female	ccRCC	2	I	T2a	N0	M0	3.47818	9.25351	3.00355	64.2964
16	54	Female	ccRCC	2	I	T1a	N0	M0	6.89237	8.19646	39.6707	55.4584
17	54	Female	ccRCC	2	I	T1a	N0	M0	6.29846	13.7847	32.8996	52.1044
18	47	Male	ccRCC	2	I	T1a	N0	M0	6.75053	5.79577	52.3457	51.7445
19	50	Male	ccRCC	NA*	NA	NA	NA	NA	5.4768	12.6407	0.823591	10.091
20	55	Male	ccRCC	2	I	T1a	N0	M1	5.29024	13.3614	0.920188	11.432
21	68	Male	ccRCC	2	I	T2a	N0	M0	4.83439	13.4543	0.835088	10.4469
22	73	Female	ccRCC	2	II	T1a	N0	M0	3.23403	3.52266	13.8967	31.0531
23	43	Male	ccRCC	2	I	T2b	N0	M0	2.7384	3.64689	16.641	30.8386
24	57	Male	ccRCC	2	IV	T4	N0	M1	3.32495	4.39745	21.0634	28.1813
25	31	Male	ccRCC	2	III	T3b	N0	M0	15.1719	38.8094	8.69388	21.6556
26	55	Male	ccRCC	2	I	T1a	N0	M0	14.3535	37.7481	13.2691	21.9579
27	68	Male	ccRCC	2	III	T3b	N0	M0	18.4217	31.3053	9.51366	17.8353
28	66	Female	ccRCC	2	IV	T4	N0	M1	0.782773	0.267325	0.296616	0.398688
29	53	Male	ccRCC	2	I	T1a	N0	M0	0.601513	0.23761	0.214146	0.41851
30	52	Male	ccRCC	2	I	T1a	N0	M0	0.601513	0.211198	0.23761	0.379806
31	55	Female	ccRCC	4	IV	T4	N0	M1	1.5351	0.409897	4.43828	1.66632
32	32	Female	ccRCC	2	I	T1a	N0	M0	1.20442	0.393199	4.16986	1.55473
33	54	Male	ccRCC	2	III	T3b	N0	M1	1.22123	0.401462	5.16941	1.77358
34	63	Female	ccRCC	2	II	T2a	N0	M0	1.27162	0.638754	1.83613	4.01853
35	52	Female	ccRCC	2	I	T1a	N0	M0	1.19471	0.583714	2.05148	5.22948
36	65	Male	ccRCC	2	II	T2a	N0	M0	1.05458	0.629961	2.50822	4.68051
*Note: Not available.
